# Supplementary material for: SMURF1 and SMURF2 directly target GLI1 for ubiquitination and proteasome-dependent degradation
Source: PubMed Central journal article supplement (PMC11655642; doi:10.1038/s41420-024-02260-4), 2024-12-18

**FIGURE 1A**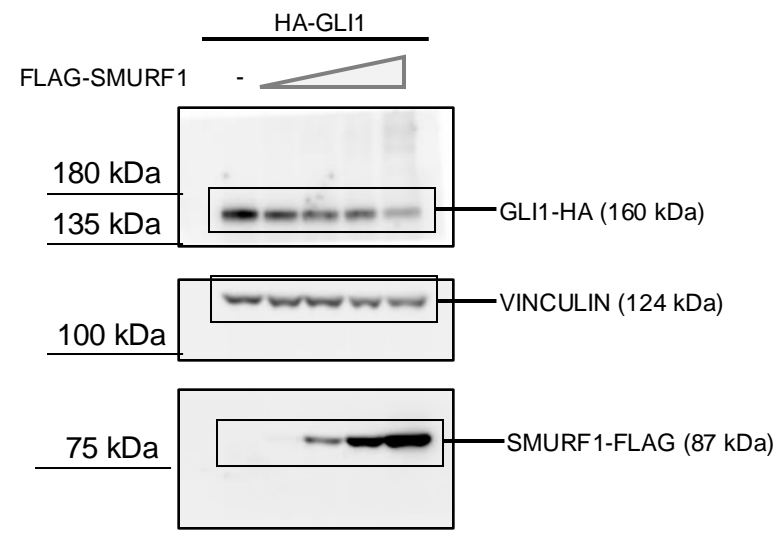**FIGURE 1B**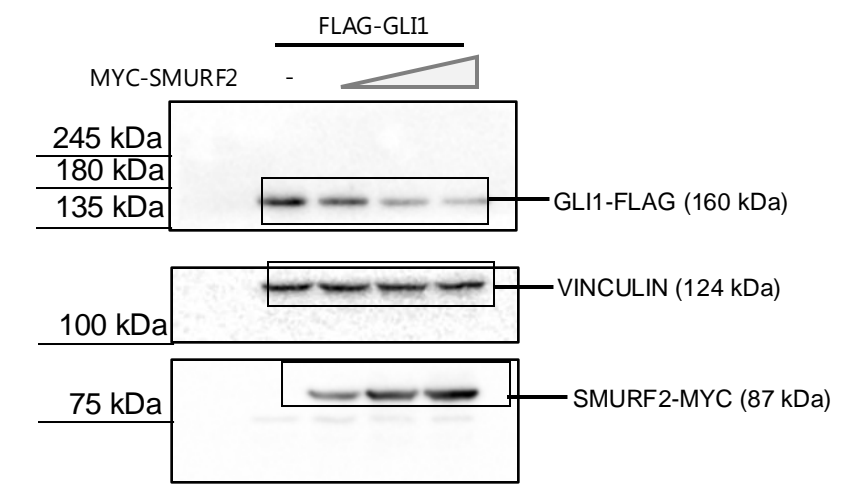**FIGURE 1C**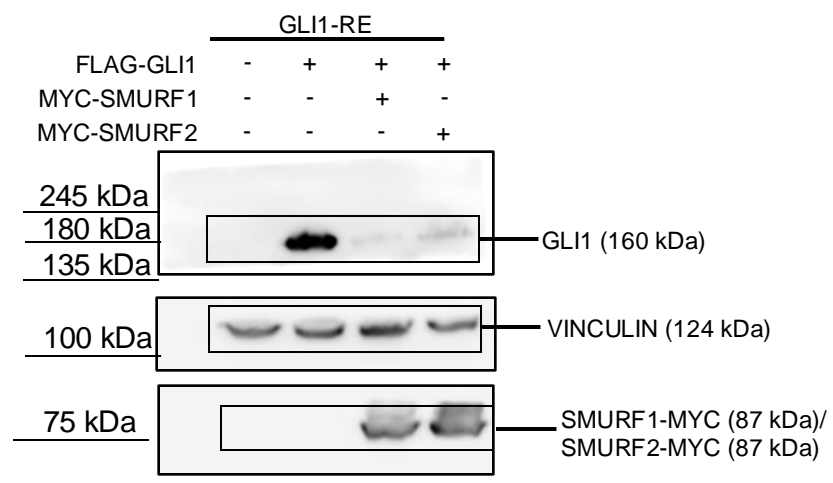**FIGURE 1D**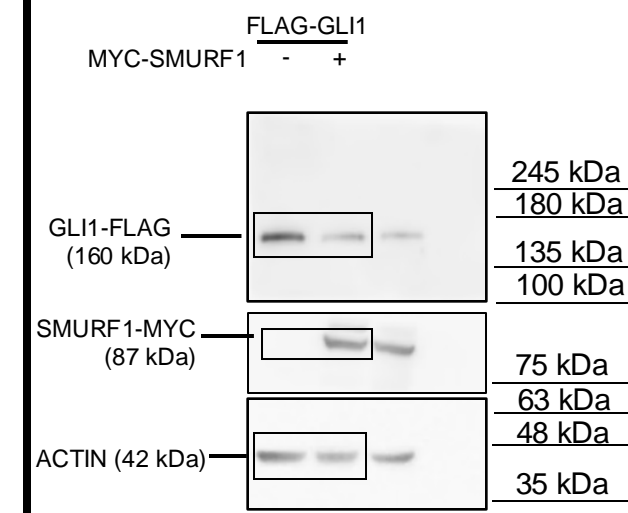**FIGURE 1E**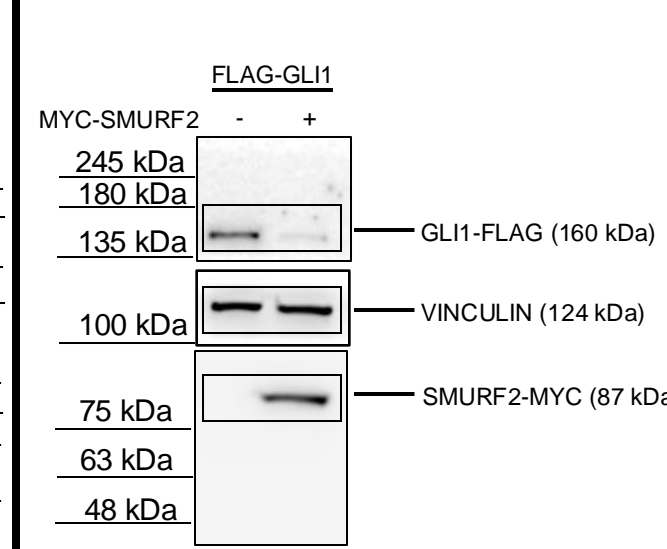

**FIGURE 1G**

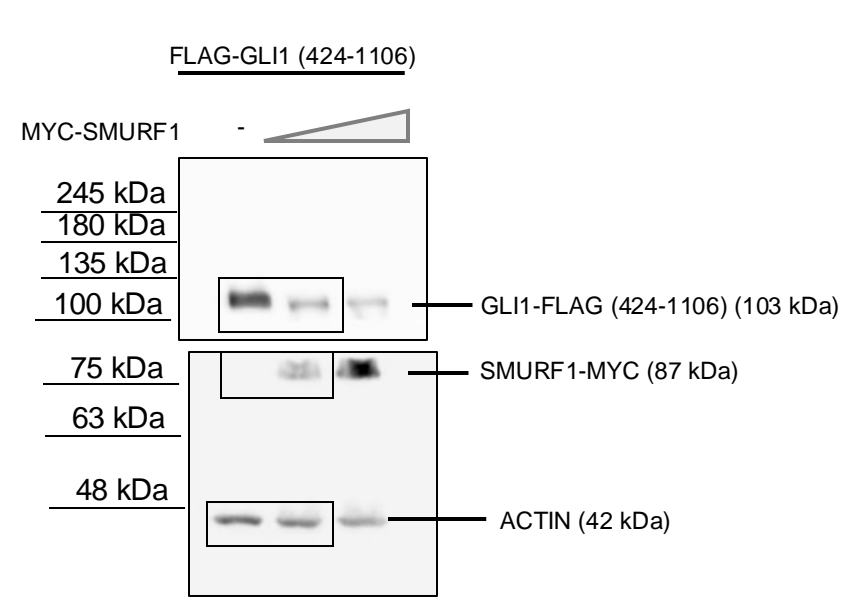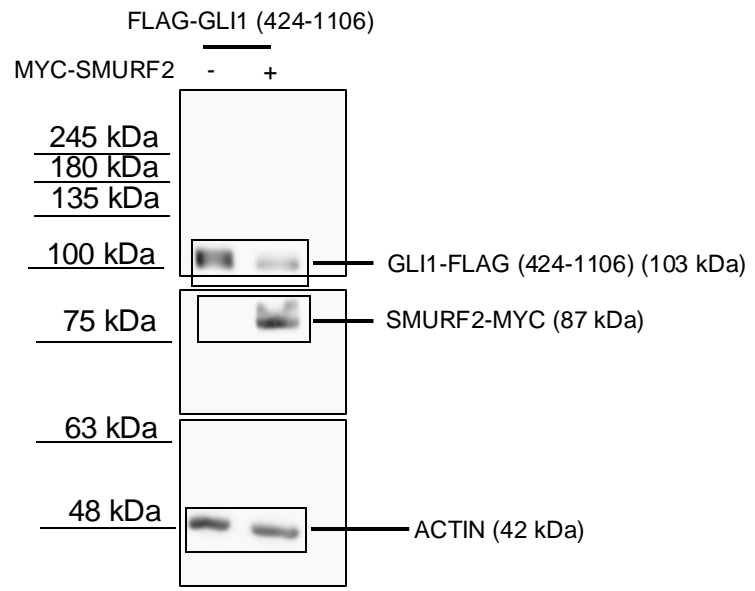

**FIGURE 1H**

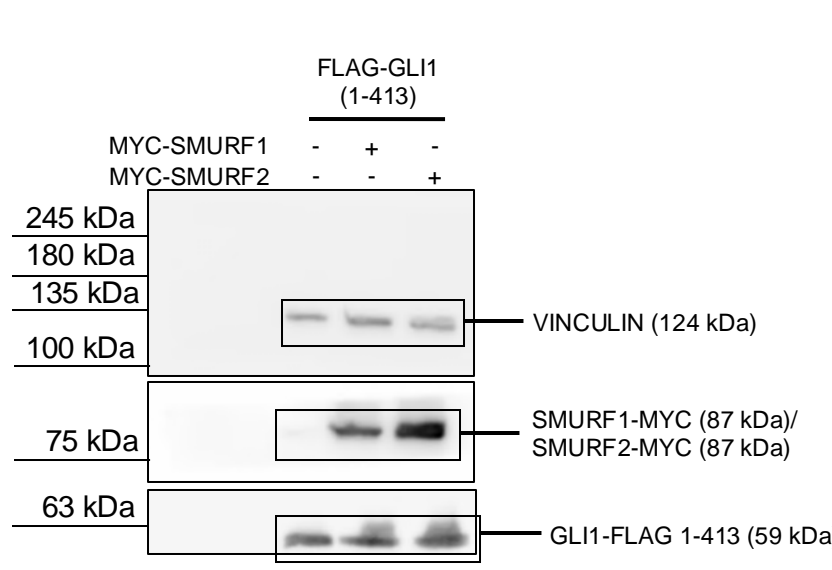

**FIGURE 2A**

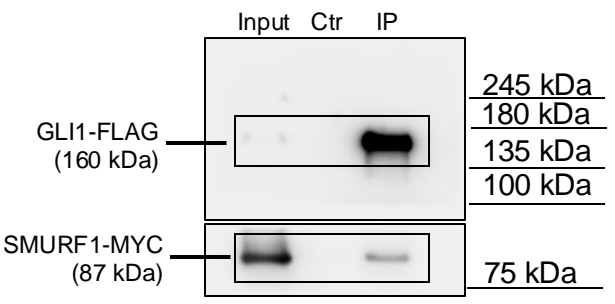

**FIGURE 2B**

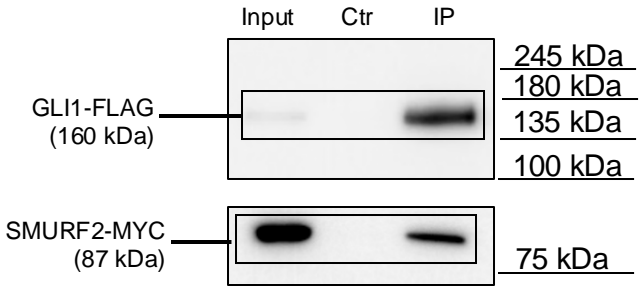

**FIGURE 2D**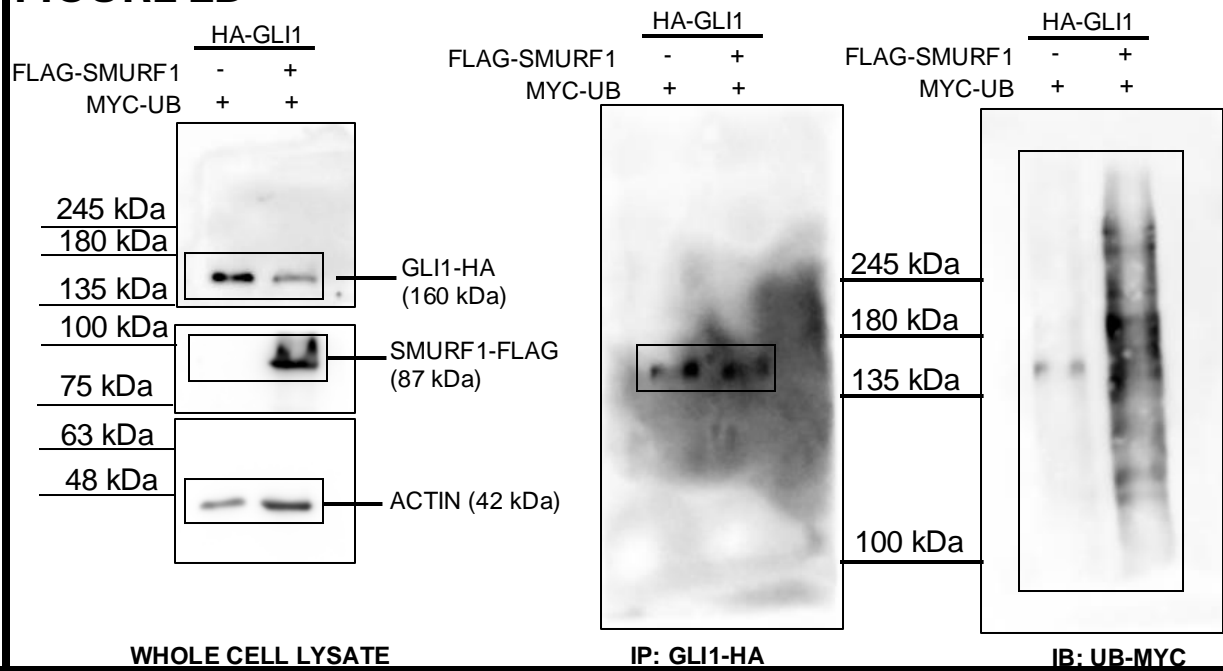**FIGURE 2E**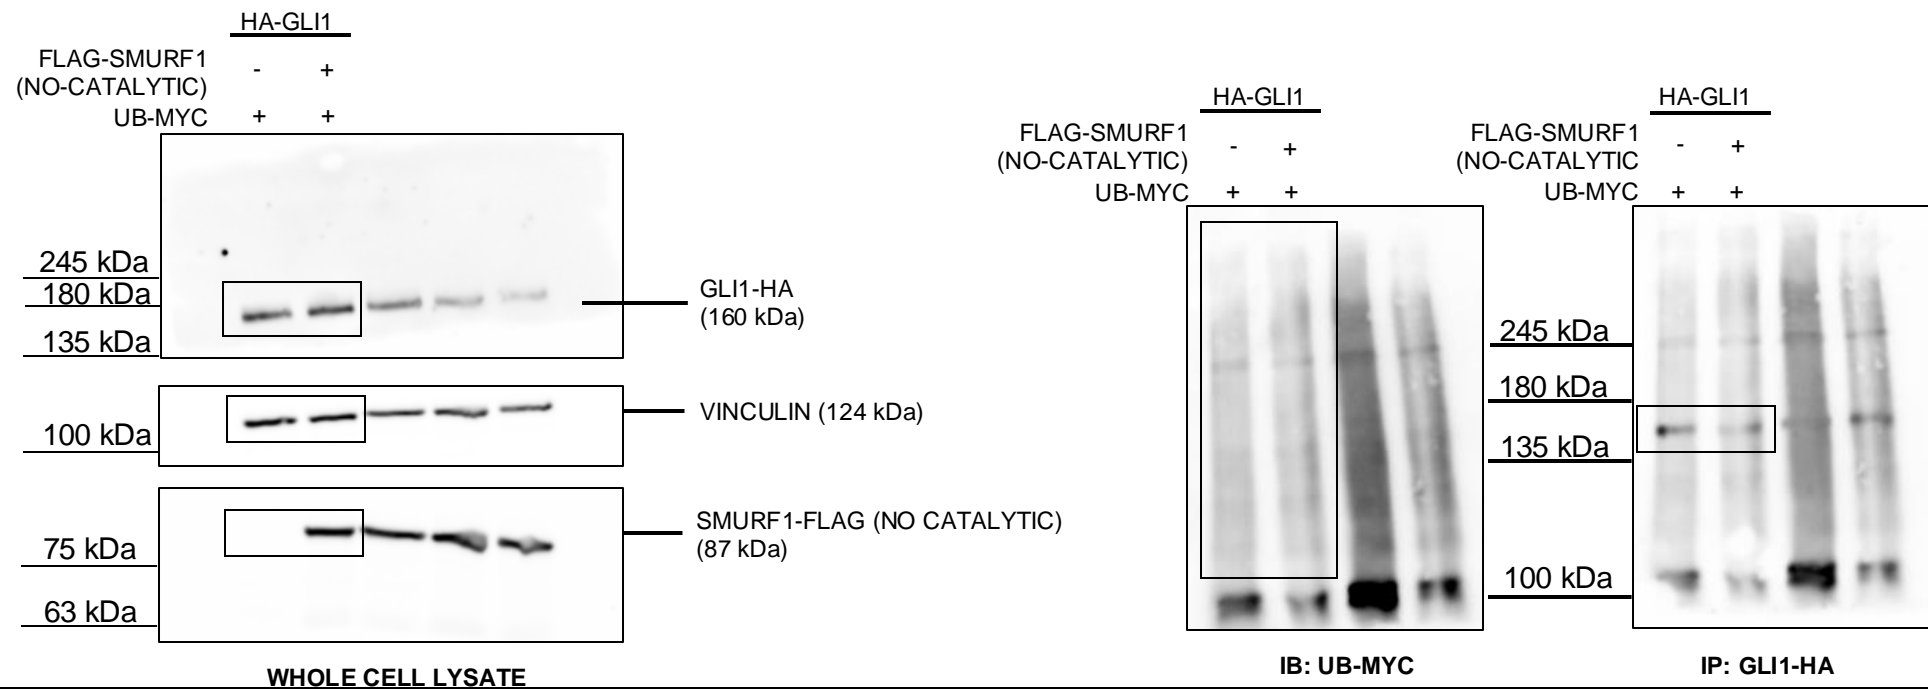

**FIGURE 2F**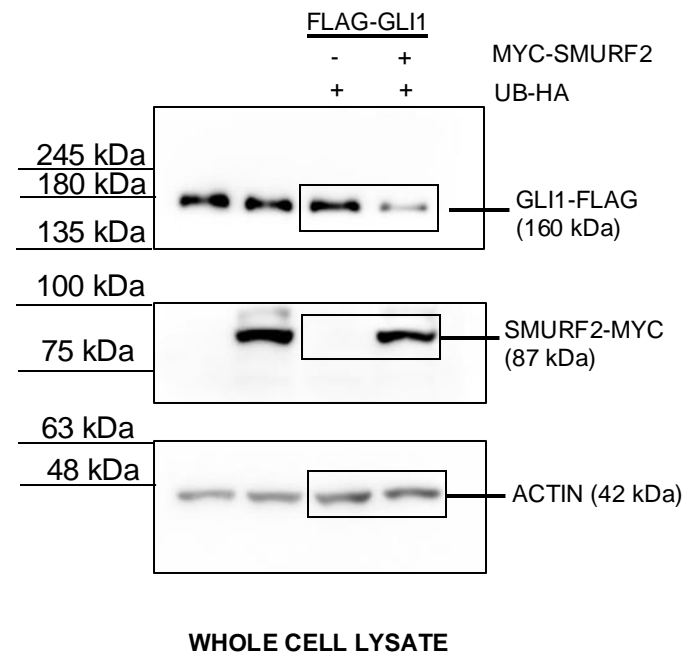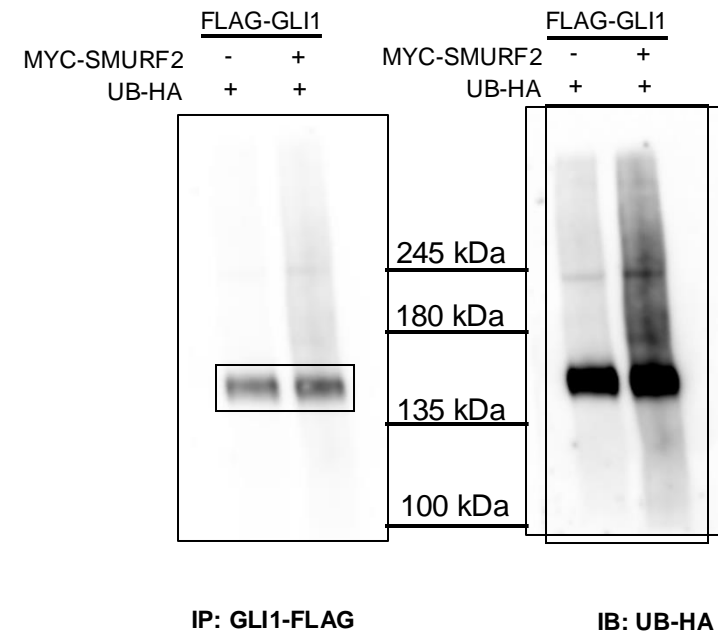**FIGURE 2G**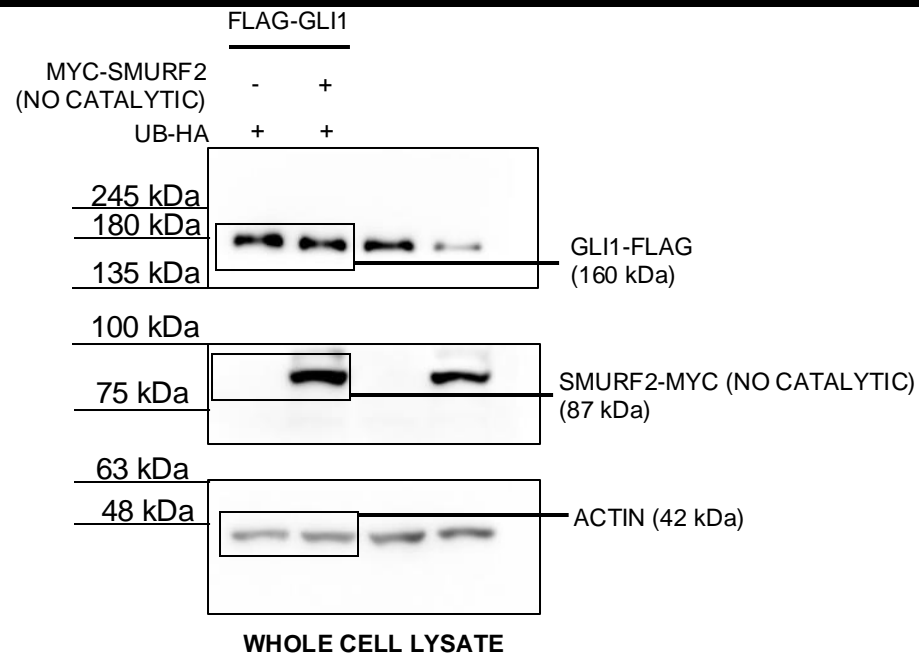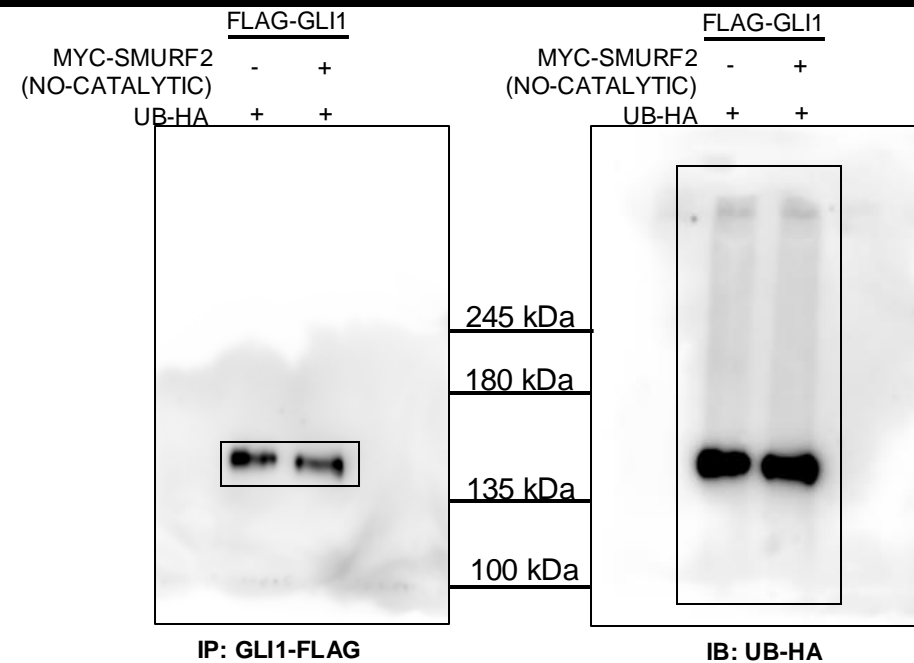

**FIGURE 3A**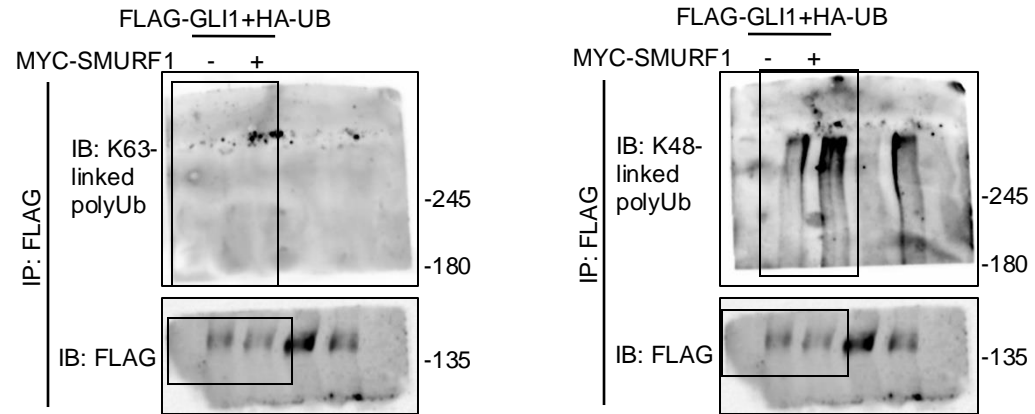**FIGURE 3B**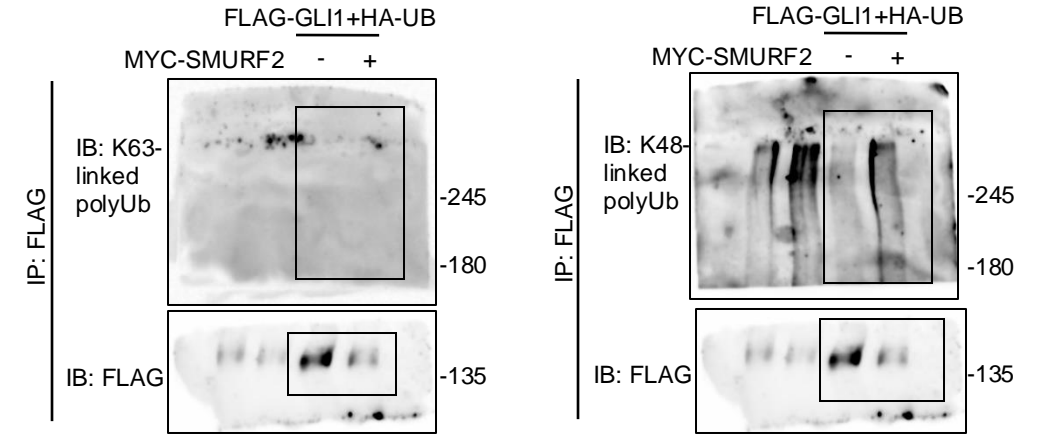**FIGURE 3C**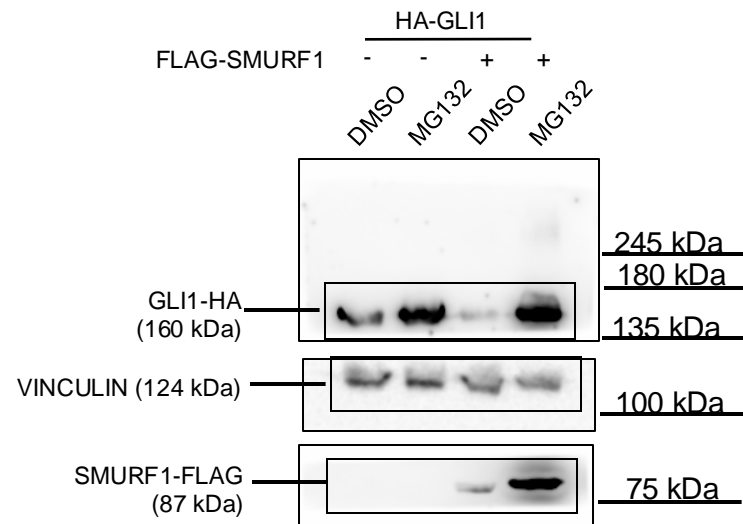**FIGURE 3D**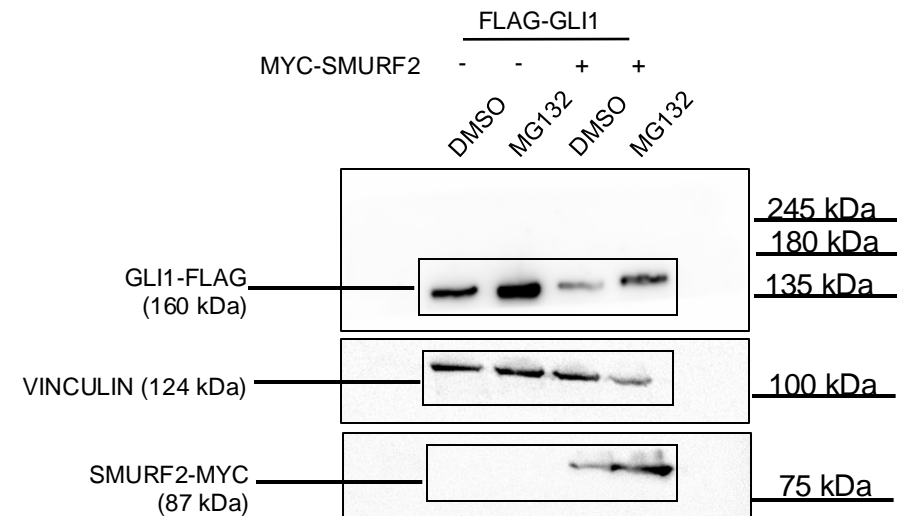

**FIGURE 4A**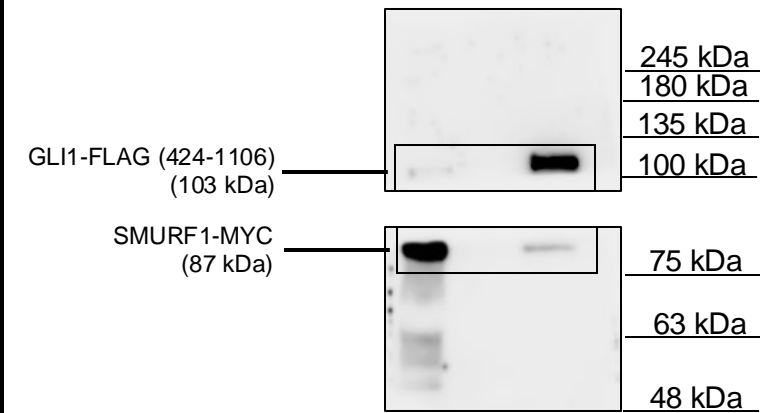**FIGURE 4B**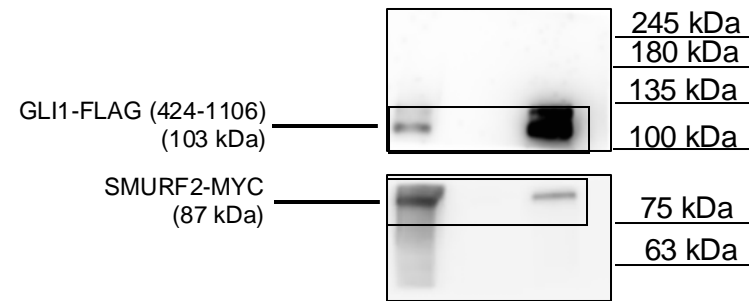**FIGURE 4C**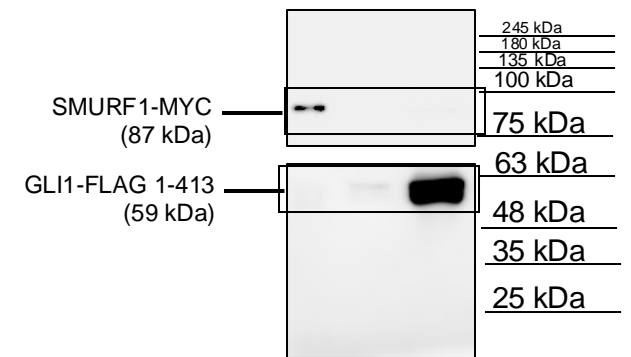**FIGURE 4D**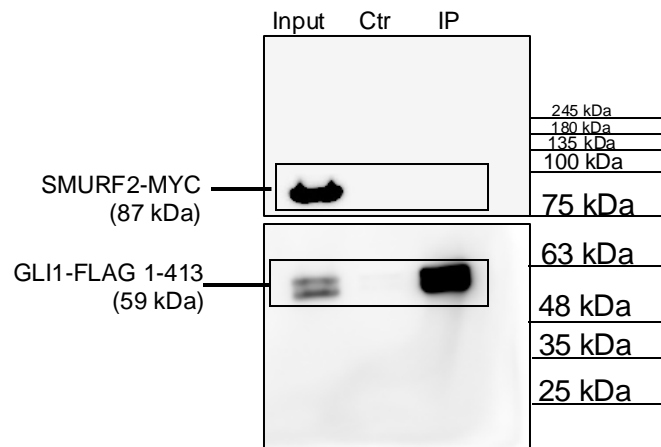**FIGURE 4E**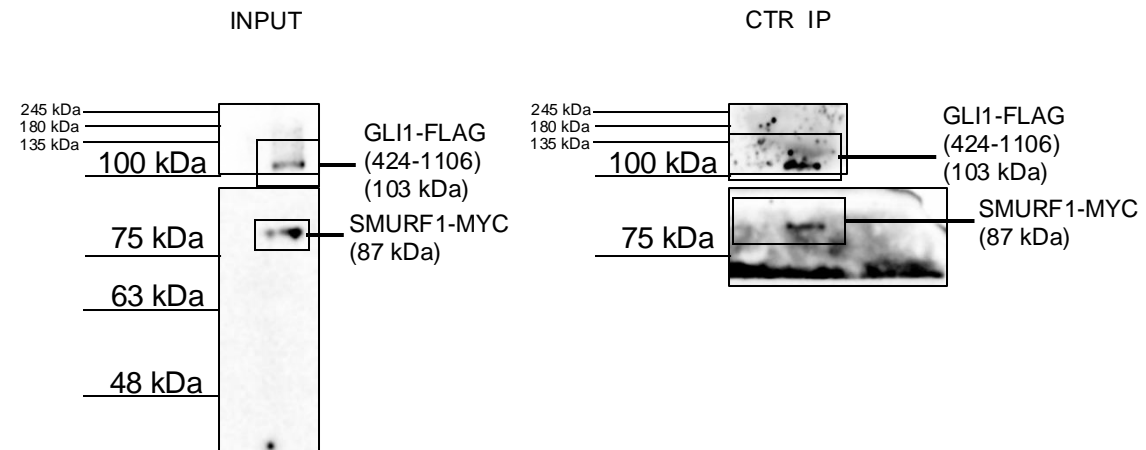

**FIGURE 4F**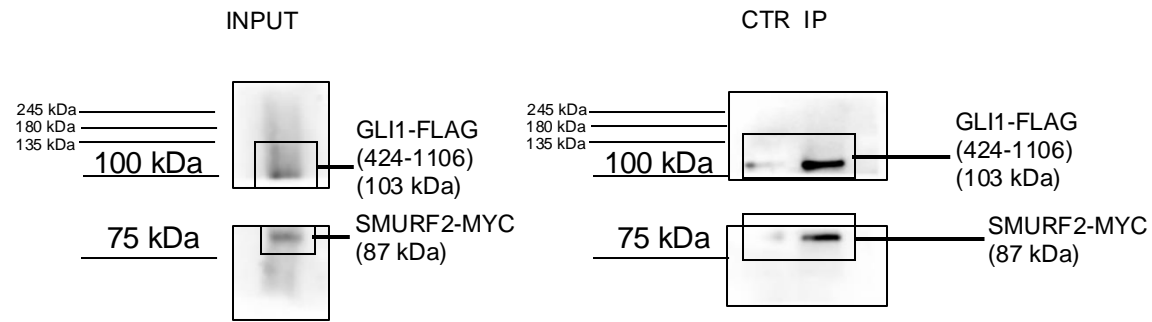**FIGURE 4G**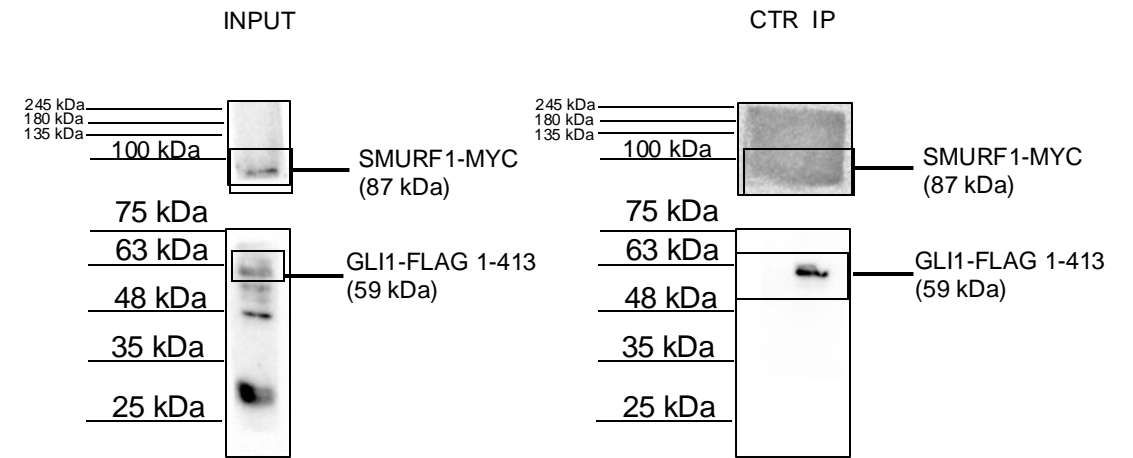**FIGURE 4H**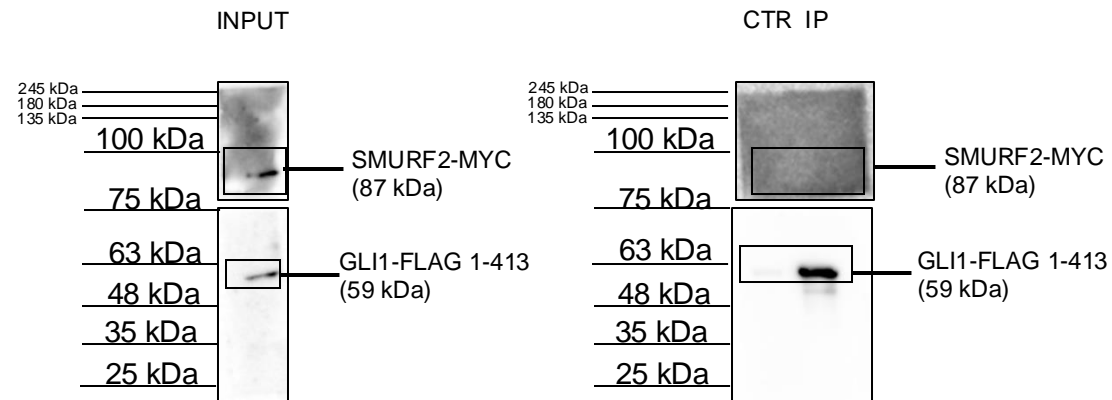**FIGURE 4I**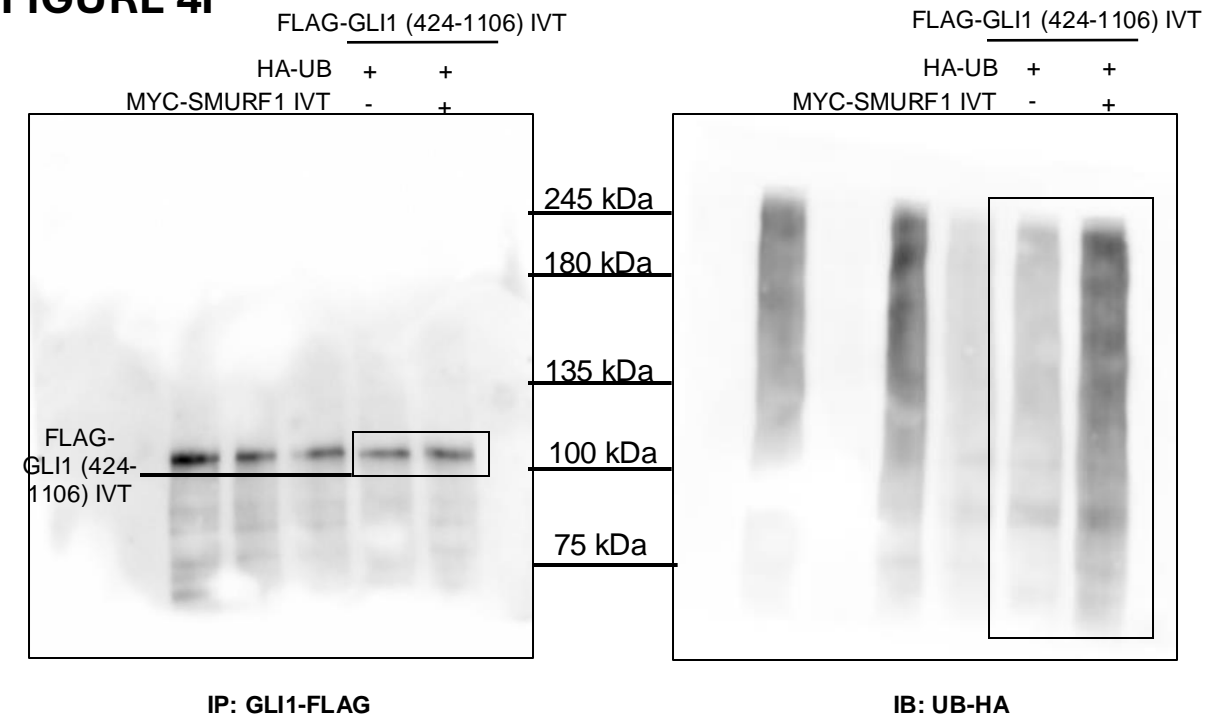

**FIGURE 4J**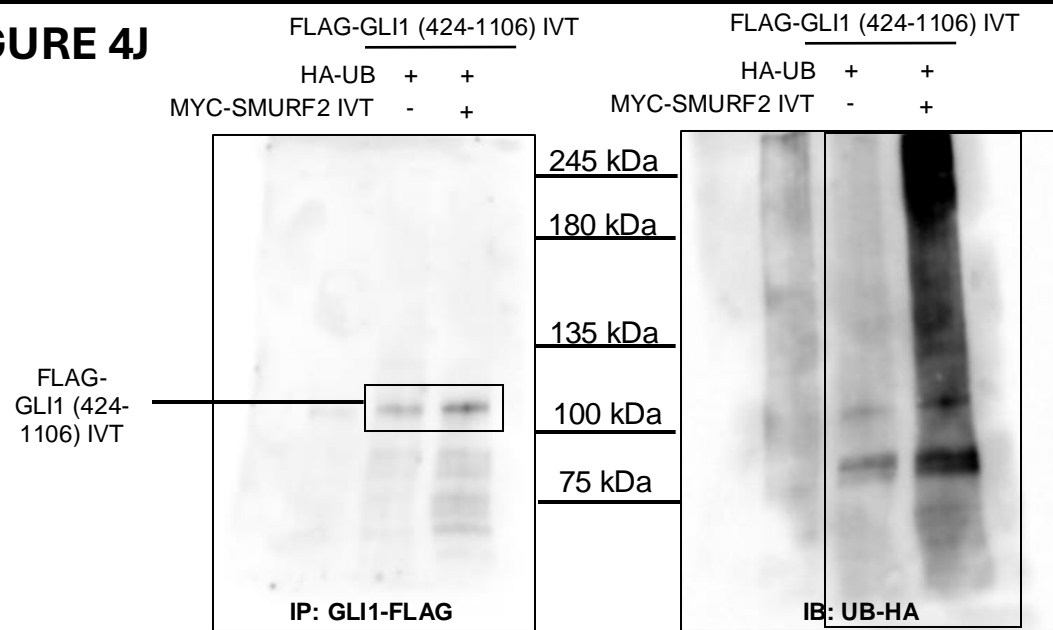**FIGURE 4K**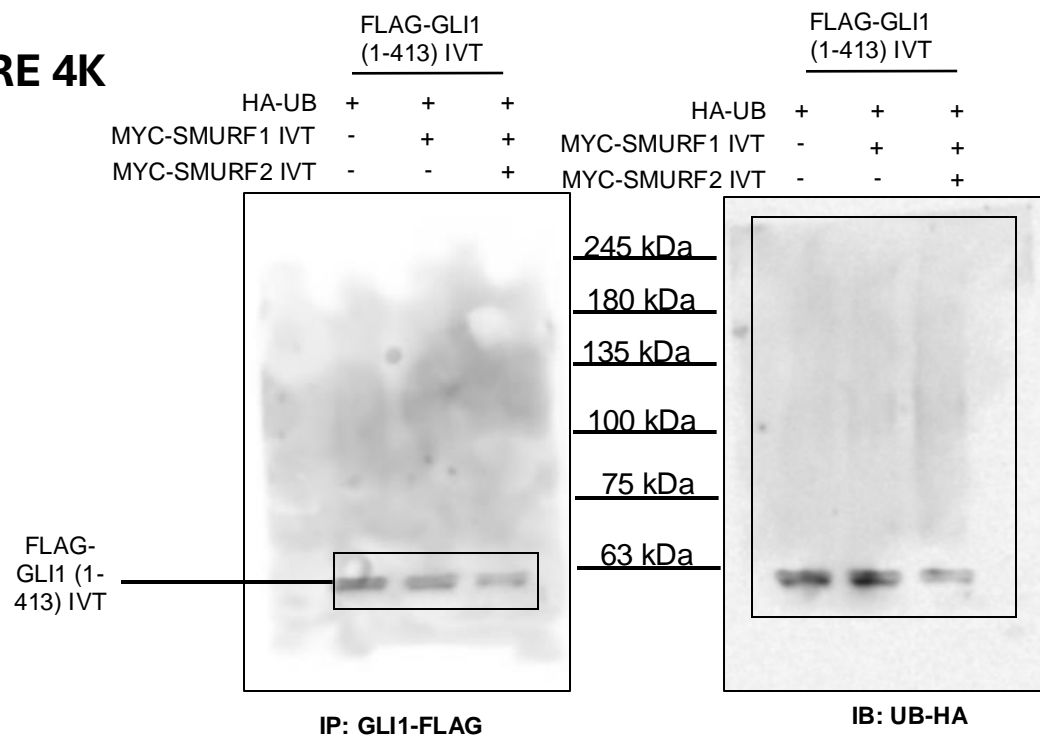**FIGURE 4L**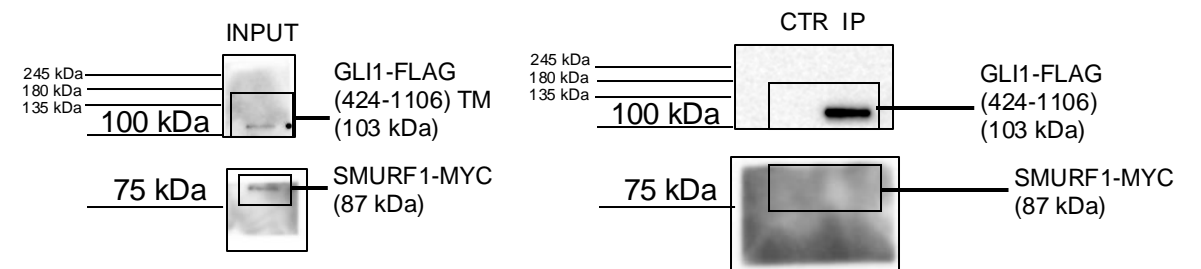



**FIGURE 4M**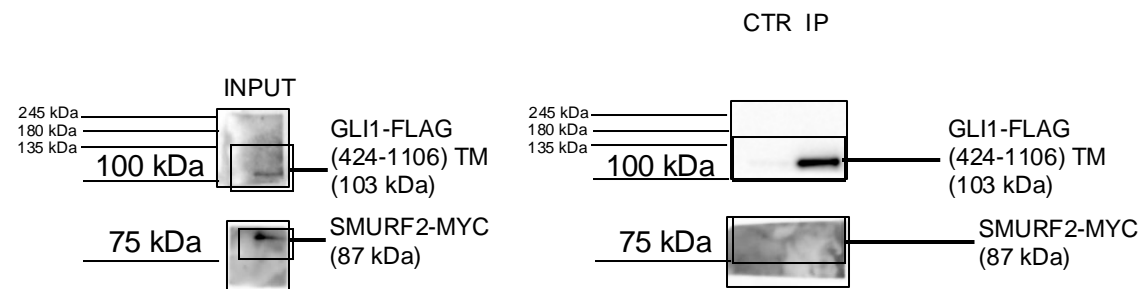**FIGURE 4N**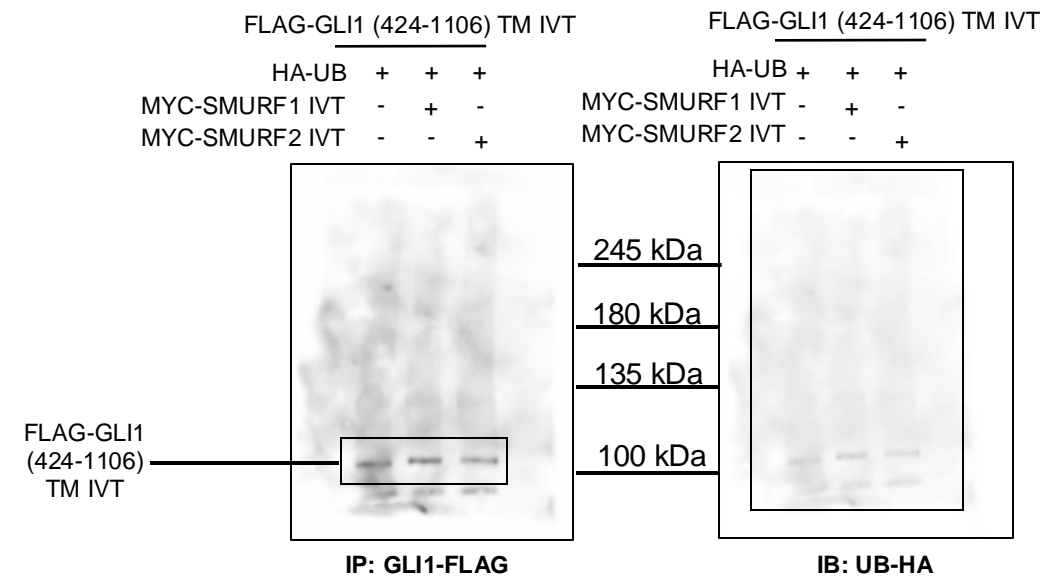**FIGURE 5A**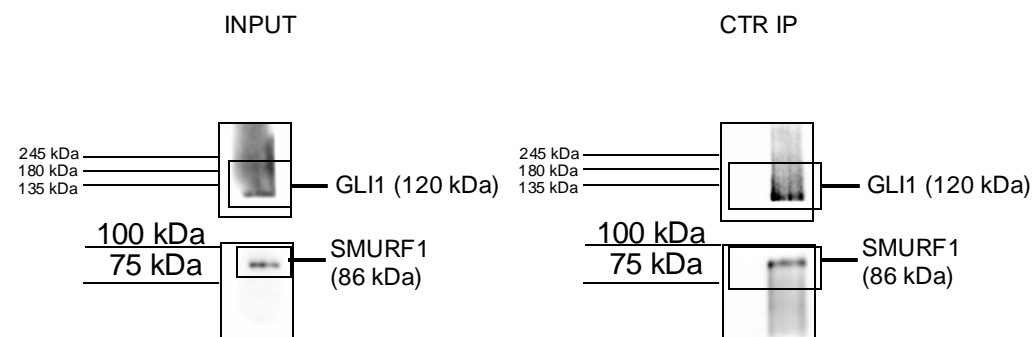**FIGURE 5B**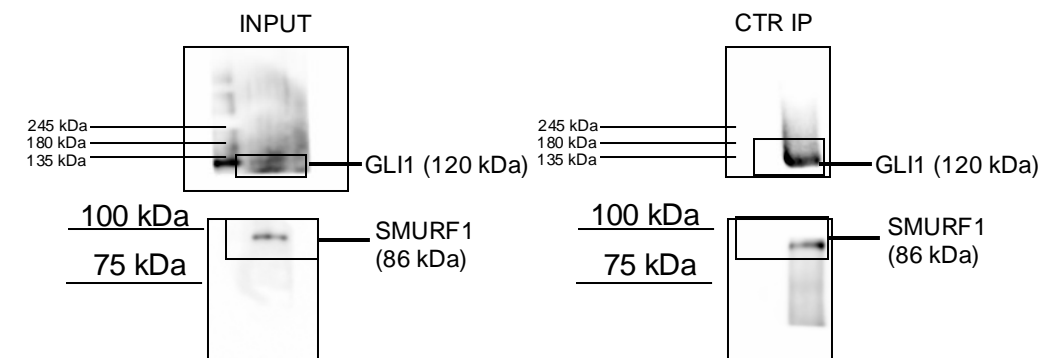

**FIGURE 5C**

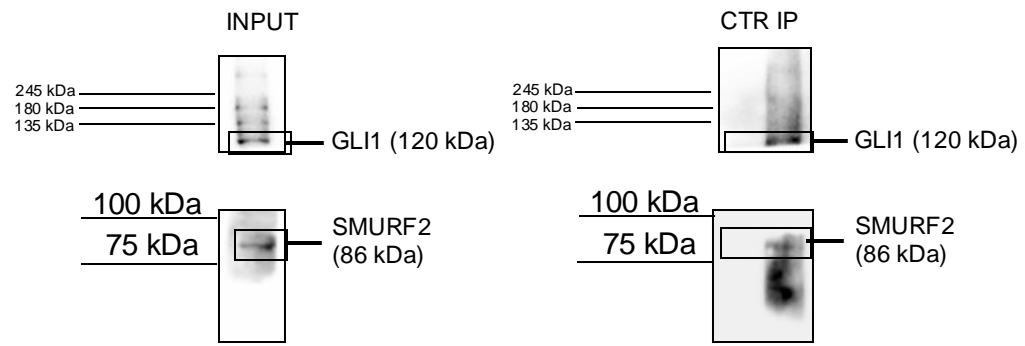

**FIGURE 5D**

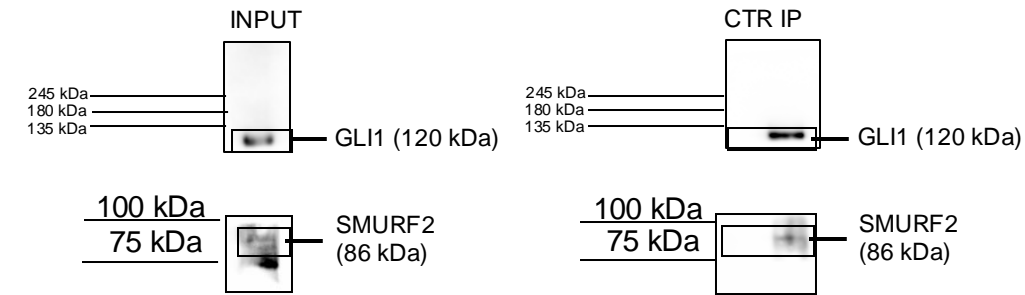

**FIGURE 5E**

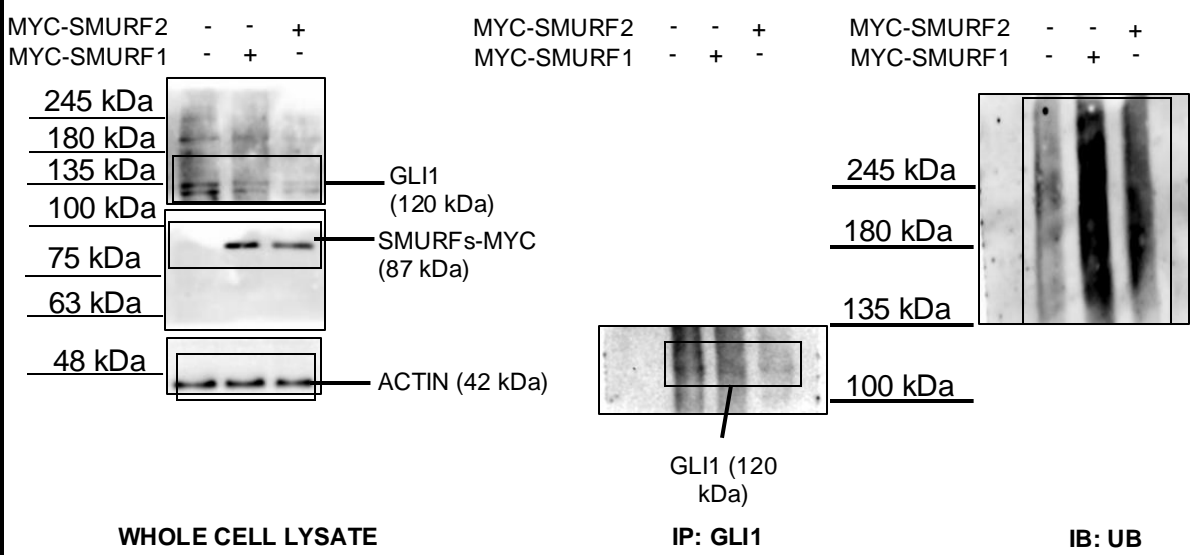

**FIGURE 5F**

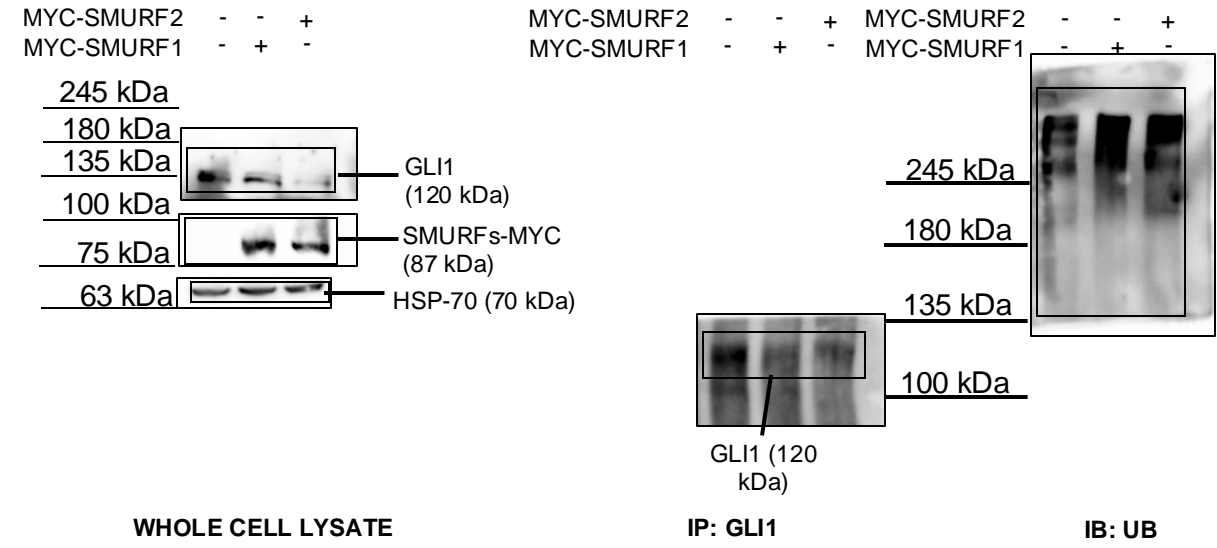

**FIGURE 5G**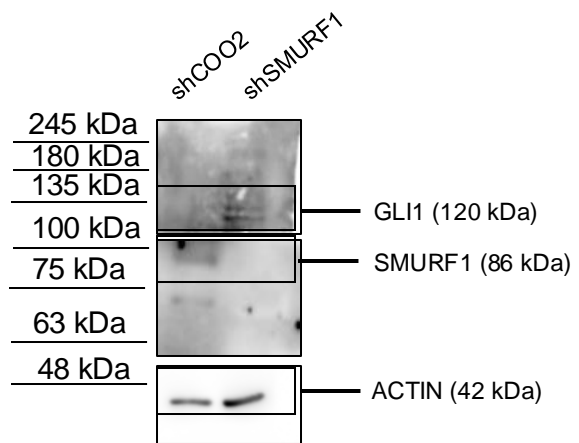**FIGURE 5H**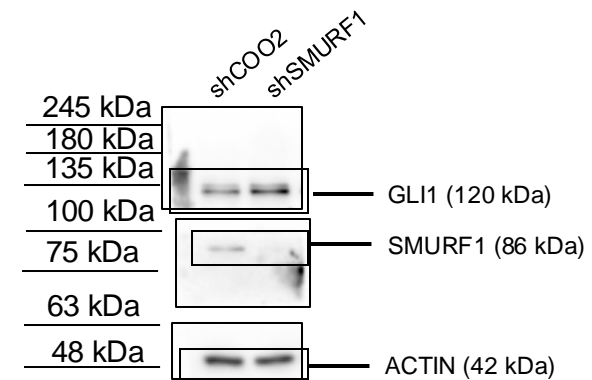**FIGURE 5I**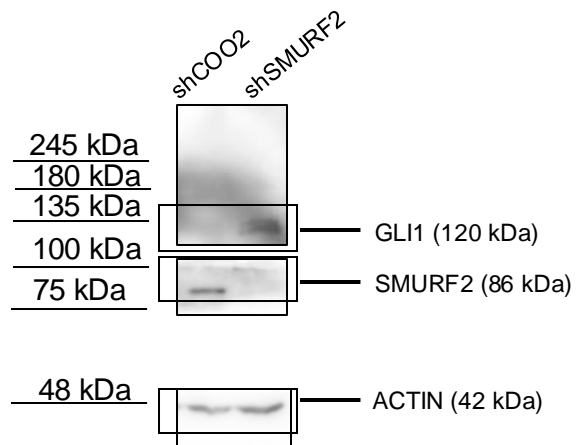**FIGURE 5J**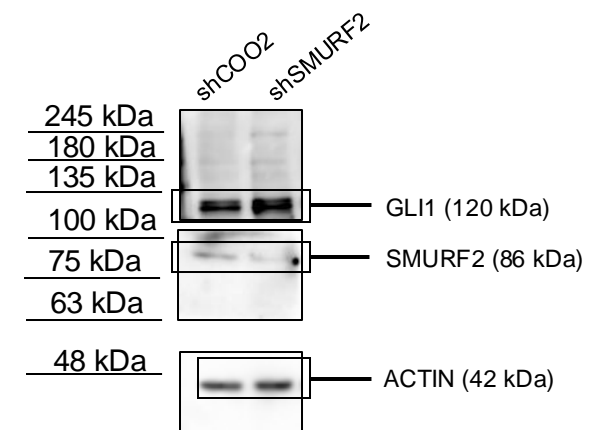

**FIGURE 5K**

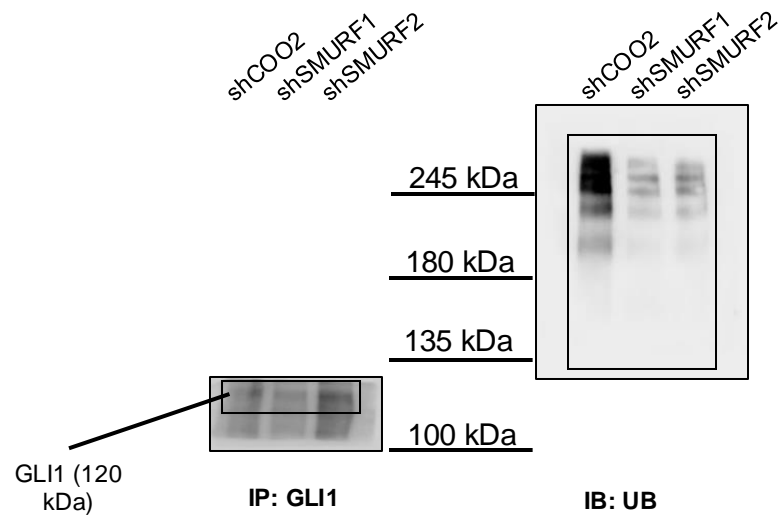

**FIGURE 5L**

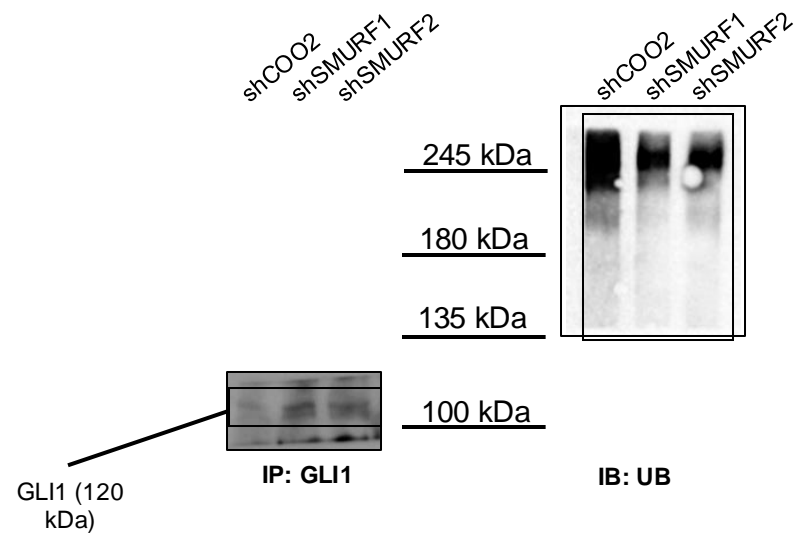

## SUPPLEMENTARY S2A

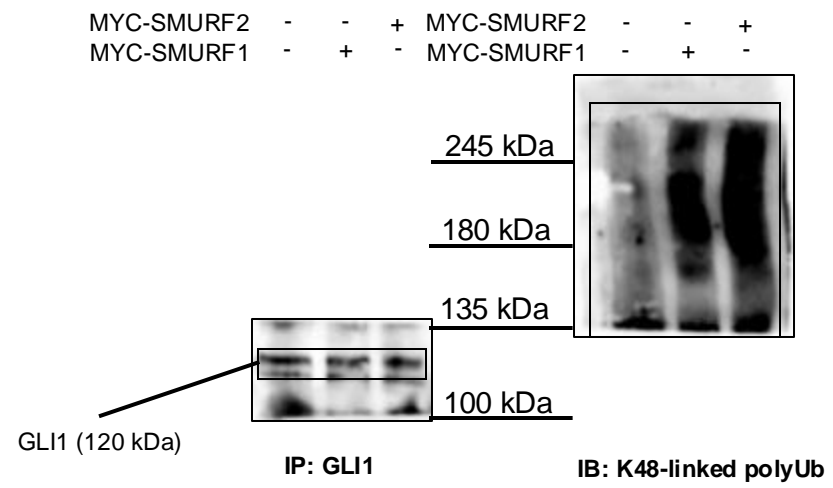

## SUPPLEMENTARY S2B

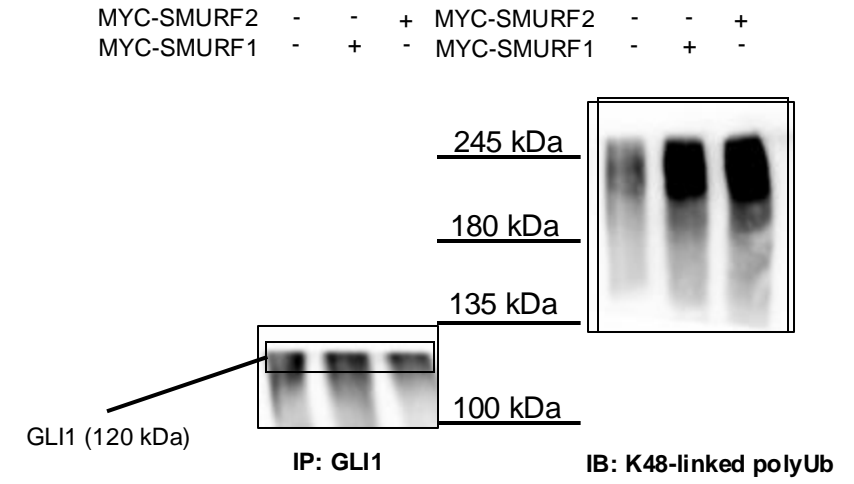

# SUPPLEMENTARY 3A

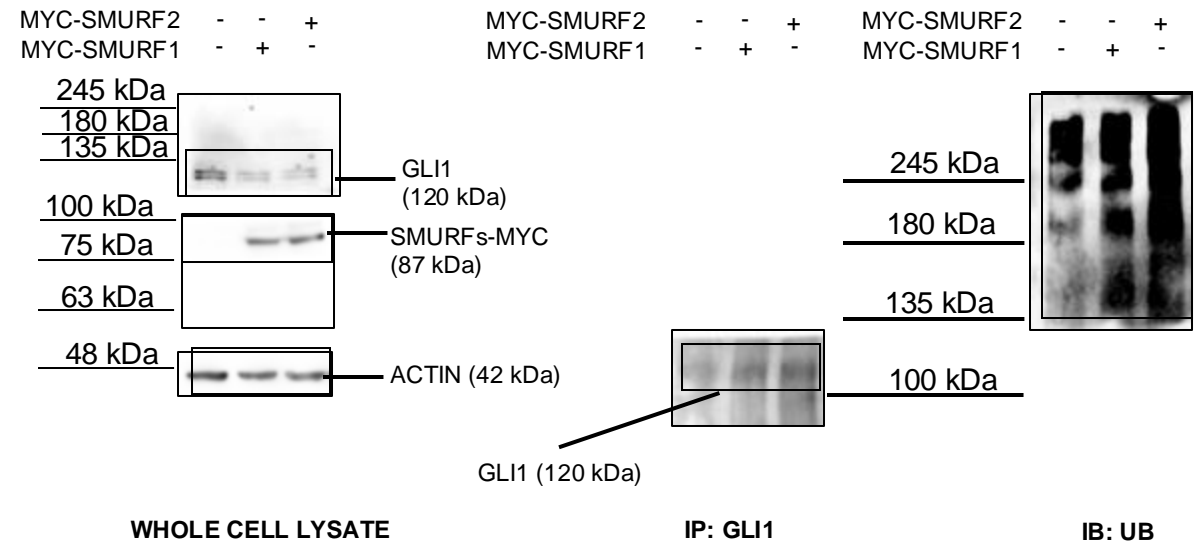

# SUPPLEMENTARY 3B

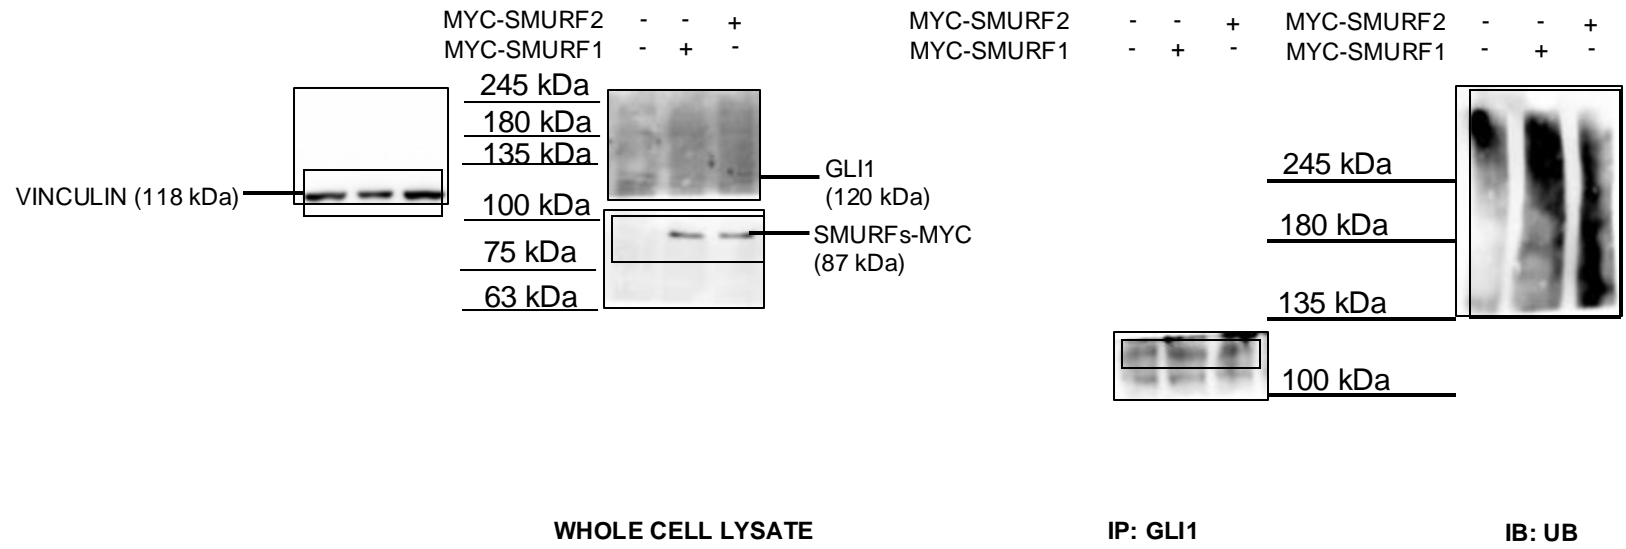

# SUPPLEMENTARY 6B

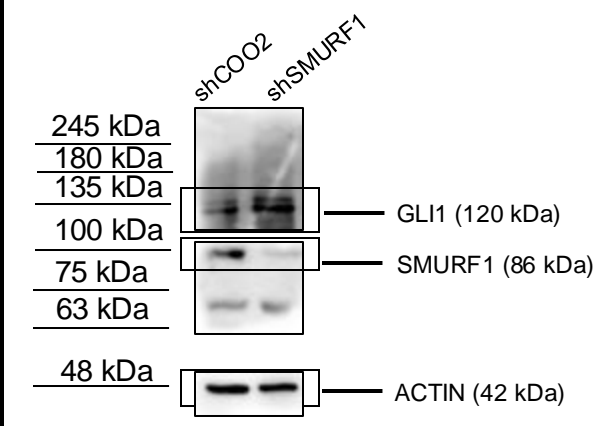

# SUPPLEMENTARY 6C

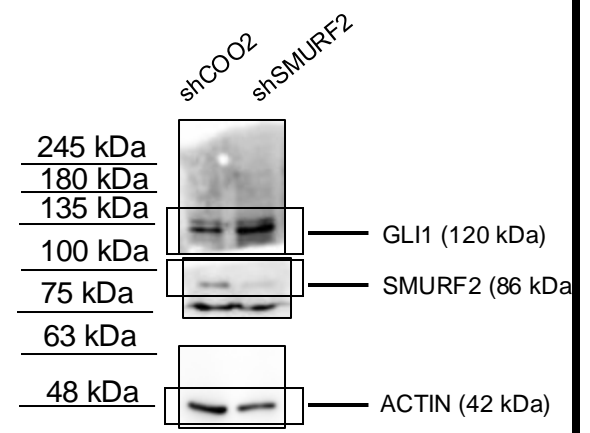

# SUPPLEMENTARY S8A

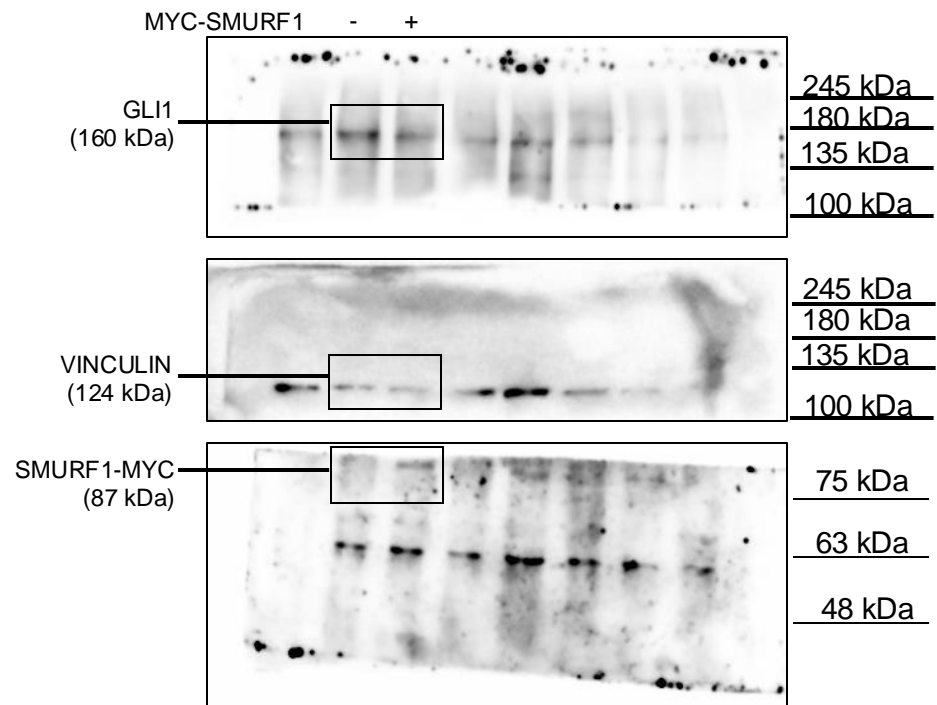

# SUPPLEMENTARY S8B

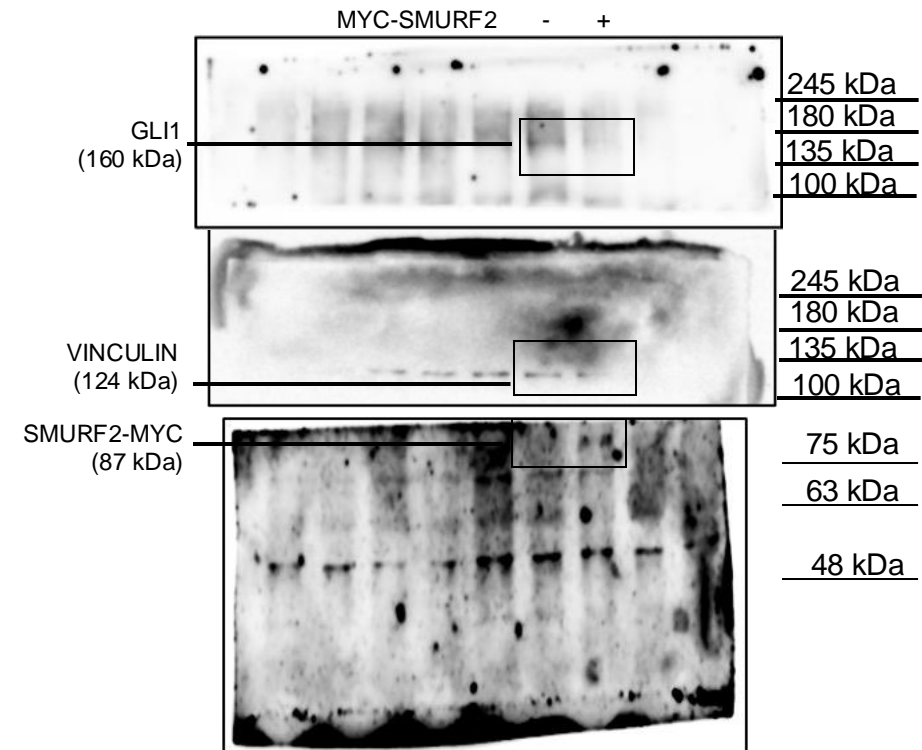

Supplement: 41420_2024_2260_MOESM2_ESM.pdf [file 41420_2024_2260_MOESM2_ESM.pdf]
