# Supplementary material for: SMURF1 and SMURF2 directly target GLI1 for ubiquitination and proteasome-dependent degradation
Source: PubMed Central journal article supplement (PMC11655642; doi:10.1038/s41420-024-02260-4), 2024-12-18
Supplement: 41420_2024_2260_MOESM1_ESM.pdf [file 41420_2024_2260_MOESM1_ESM.pdf]

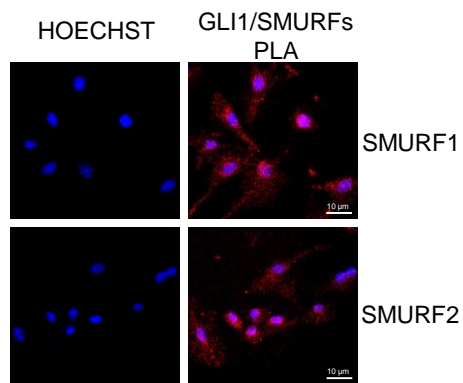

**Supplementary Figure S1. PLA assay detects protein interaction between endogenous GLI1 and SMURFs in Hh-responsive NIH3T3 cells.**

Proximity ligation assay (PLA) for endogenous SMURFs and GLI1 interaction. NIH3T3 cells were fixed in paraformaldehyde (PFA) and permeabilized. Subsequently, cultures were processed with primary antibody anti-GLI1 and either anti-SMURF1 or anti-SMURF2, and with specific secondary antibodies for PLA assay (red signal), as described in Methods. Nuclei were stained blue (Hoechst).

**A**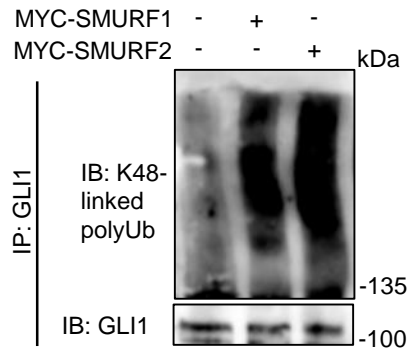**B**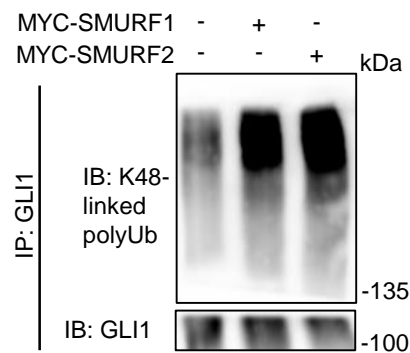

**Supplementary Figure S2. SMURFs expression triggers degradative K48-linked polyubiquitination of GLI1.**

**A-B.** Ubiquitination assays on DAOY (**panel A**) and ONS-76 (**panel B**) cells expressing either control vector, MYC-SMURF1 or MYC-SMURF2. 24h after transfection, cells were lysed, and the ubiquitination status was evaluated after endogenous GLI1 immunoprecipitation. Proteins were detected using antibodies anti-GLI1 and anti-K48-linkage specific polyubiquitin

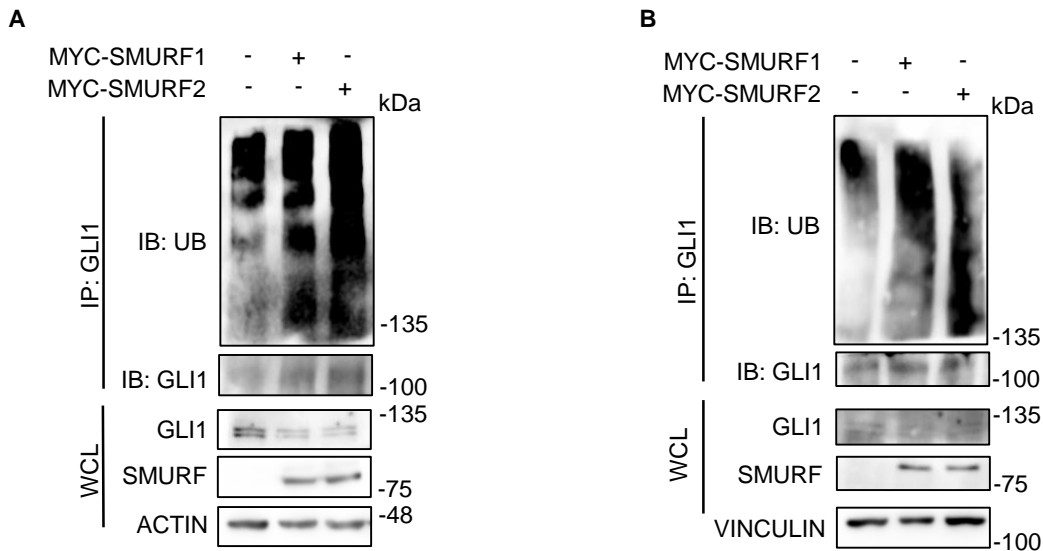

**Supplementary Figure S3. SMURFs expression promotes GLI1 ubiquitination and degradation in D283 and UW-228 MB cell.**

**A-B.** Ubiquitination assays on D283 and UW-228 cells expressing either control vector, MYC-SMURF1 or MYC-SMURF2. 24h after transfection, cells were lysed, and the ubiquitination status was evaluated following endogenous GLI1 immunoprecipitation. Proteins were detected using antibodies anti-GLI1, anti-SMURF1, anti-SMURF2, anti-Ubiquitin and anti-ACTIN (used as a normalizer).

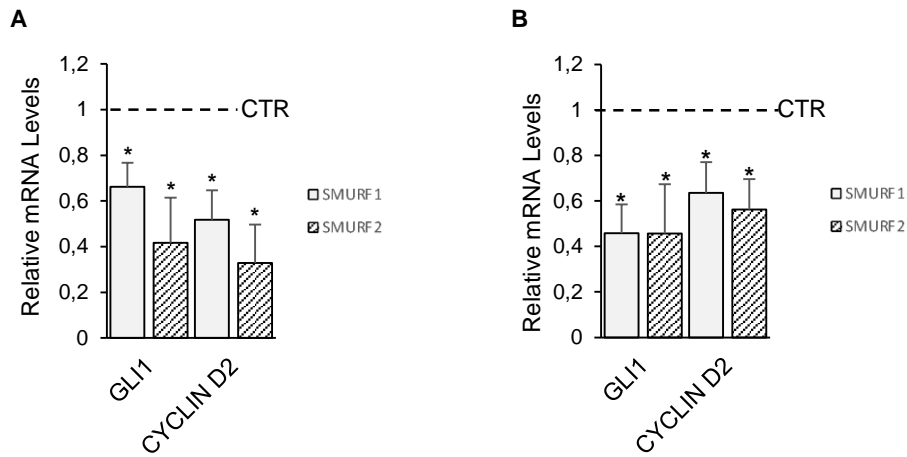

**Supplementary Figure S4. SMURFs overexpression reduces GLI1 targets expression in D283 and DAOY MB cells.**

**A-B.** RT-qPCR analysis of Hh/GLI1 target genes expression. D283 (**panel A**) and DAOY (**panel B**) cells were lysed for mRNA extraction 24h after transfection with MYC-SMURF1 or MYC-SMURF2. mRNA levels were analysed by RT-qPCR. Gli1 and Cyclin D2 mRNA expression was normalized to the average expression of two housekeeping genes.

**A**

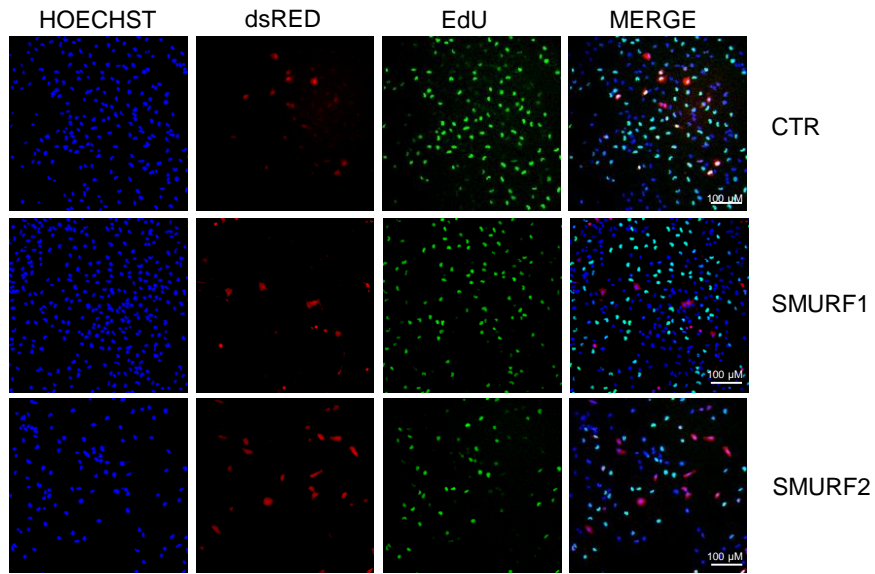

**B**

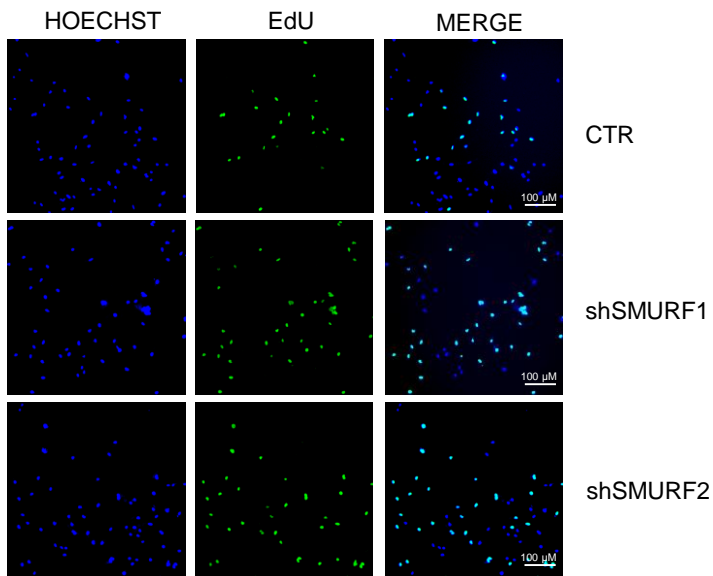

**Supplementary Figure S5. SMURFs expression reduces GLI1 dependent ONS-76 MB cell proliferation.**

**A-B.** EdU incorporation assay on ONS-76 cells expressing SMURF proteins (**panel A**) or stably transduced with shRNAs against SMURF1 or SMURF2 (**panel B**).

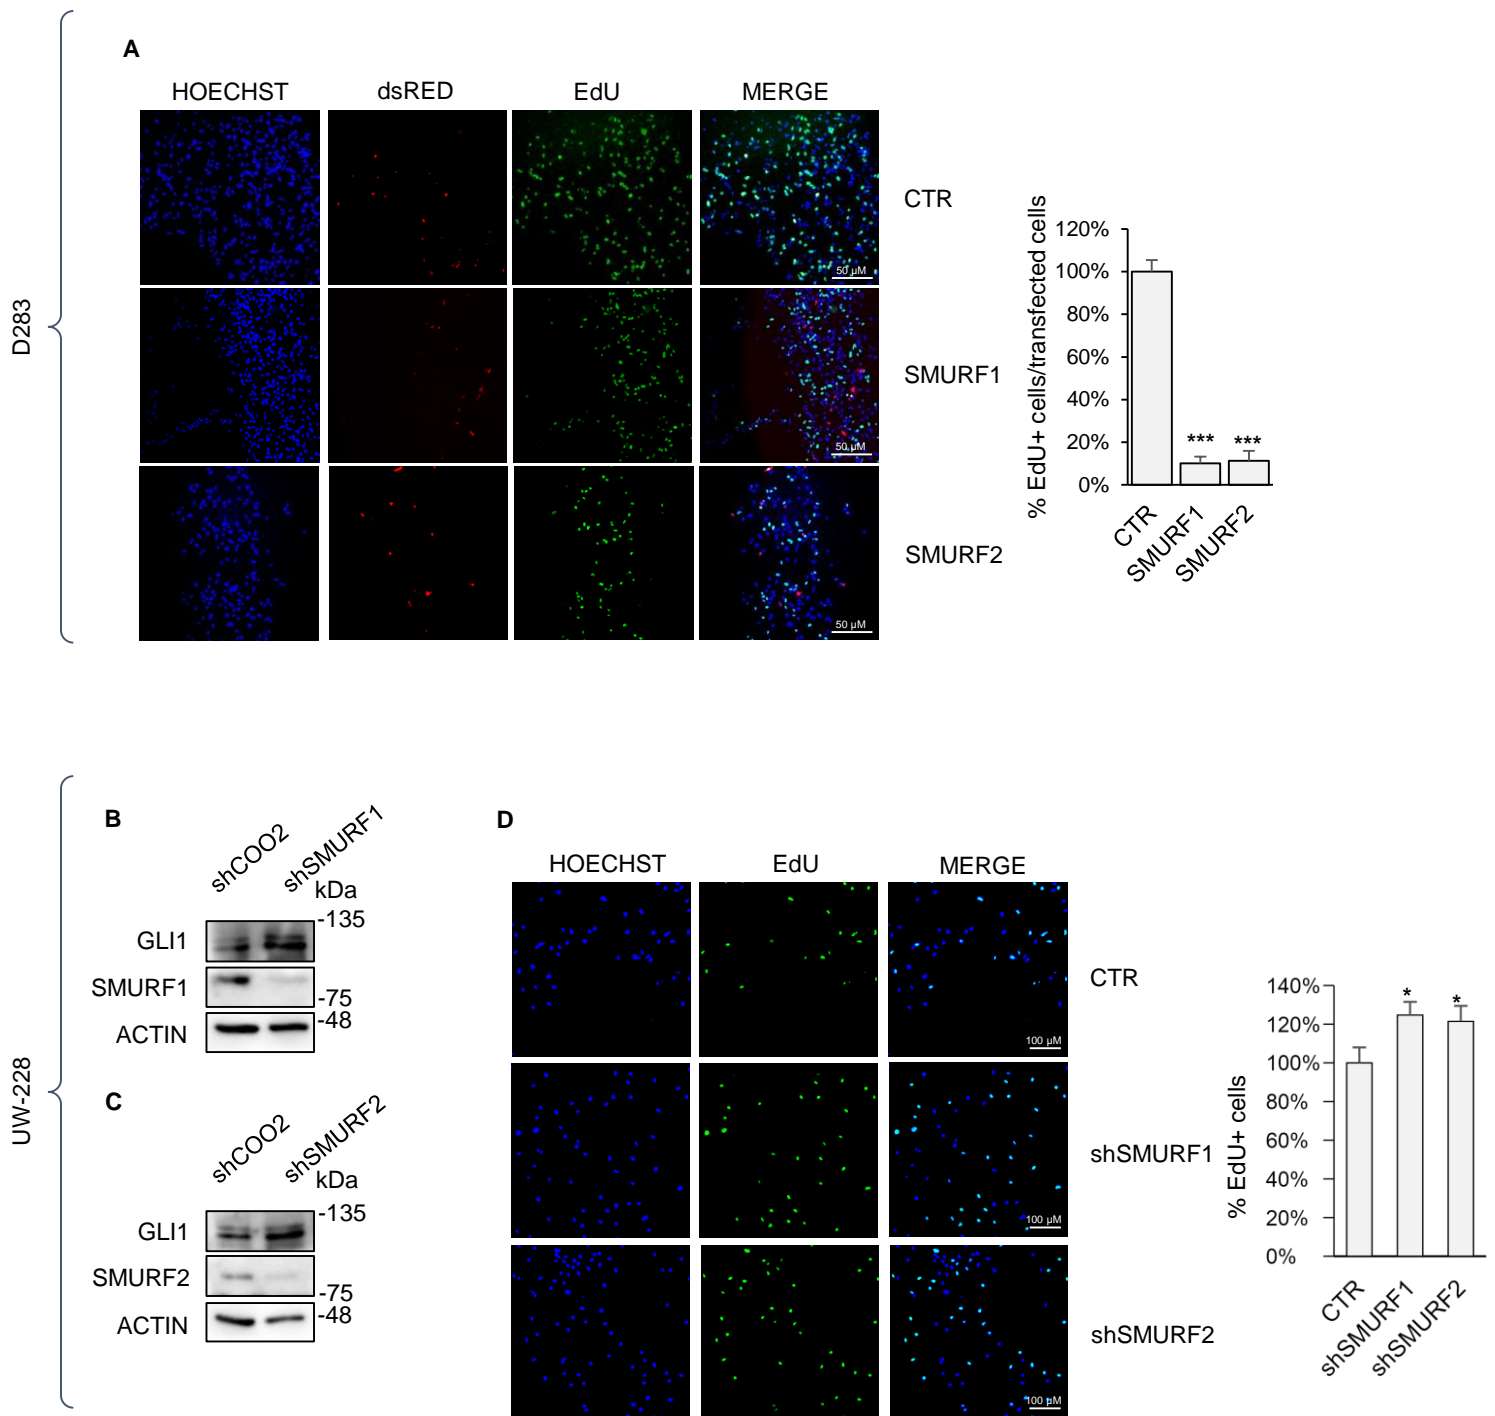

**Supplementary Figure S6. SMURFs modulation affects D283 and UW-228 MB cell proliferation by increasing or decreasing Gli1 protein levels.**

**A.** EdU incorporation staining on D283 cells expressing either SMURF1 or SMURF2. Percentage of EdU positive cells was calculated over total cells. (\* $p < 0.05$ ; results are expressed as the mean  $\pm$  SD of three independent experiments, Student's t-test). **B-C.** Analysis of Gli1 protein levels following SMURFs silencing. UW-228 cells were stably transduced with shRNAs against SMURF1 or SMURF2. Cell lysates were analysed using SDS-PAGE and antibodies anti-Gli1, anti-SMURF1, anti-SMURF2 and anti-ACTIN (used as a normalizer). **D.** EdU incorporation assay on UW-228 MB cells stably transduced with shRNAs against SMURF1 or SMURF2. Percentage of EdU positive cells was calculated over transfected or total cells as indicated. (\* $p < 0.05$ ; \*\* $p < 0.01$ ; \*\*\* $p < 0.001$ , results are expressed as the mean  $\pm$  SD of three independent experiments, Student's t-test).

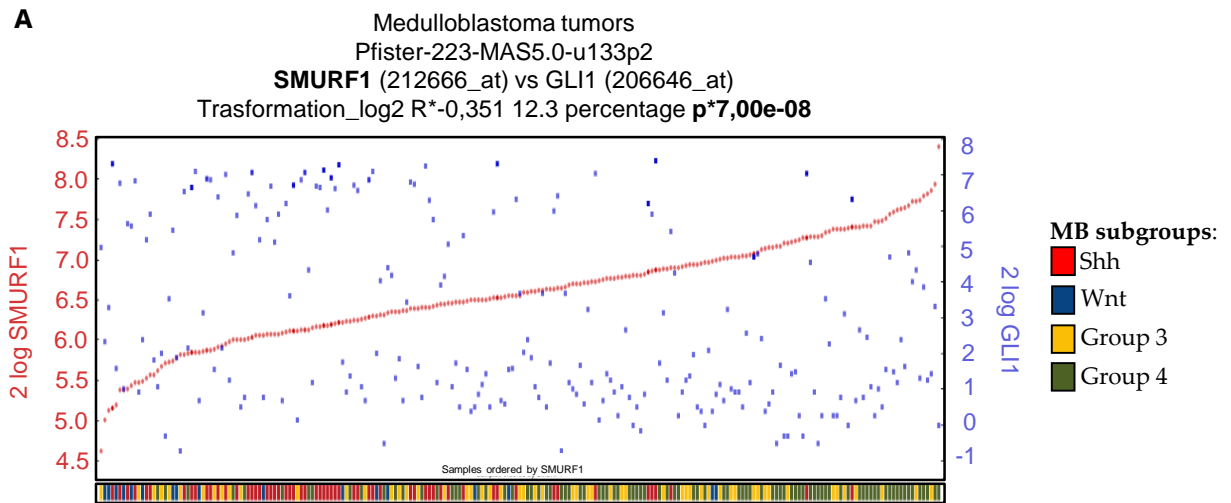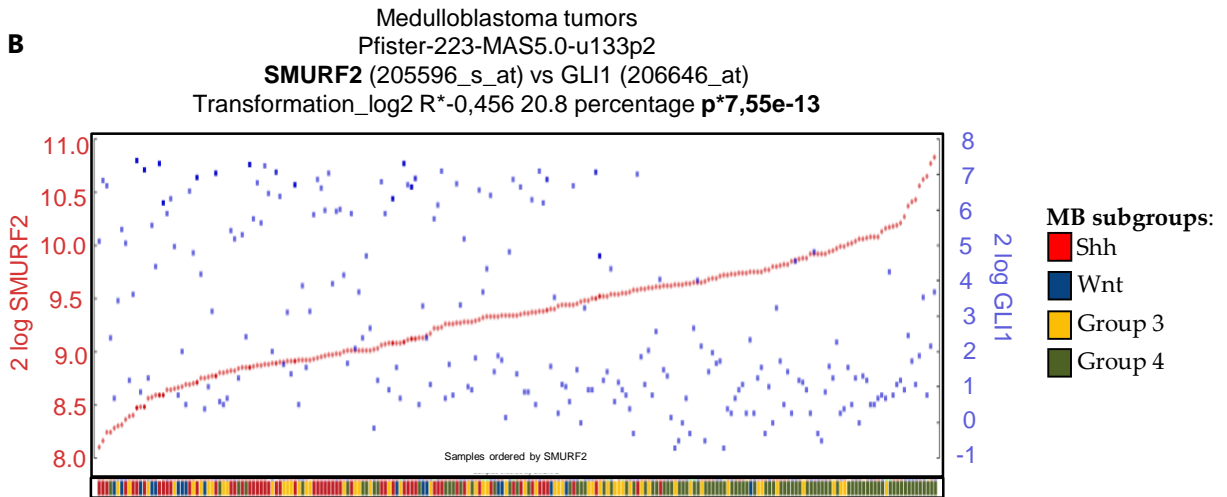

**Supplementary Figure S7. Inverse correlation between Gli1 and Smurf1/2 expression in human MB samples.**

**A-B.** In silico analysis conducted using the R2 genomic analysis and visualization platform. The correlation plot represents Gli1 and Smurf1/Smurf2 expression levels of a cohort of 223 MB patients from all 4 molecular subgroups (Northcott PA, Buchhalter I, Morrissy AS, Hovestadt V, Weischenfeldt J, Ehrenberger T et al. The whole-genome landscape of medulloblastoma subtypes. Nature. 2017 Jul 19;547(7663):311-317.).

**A**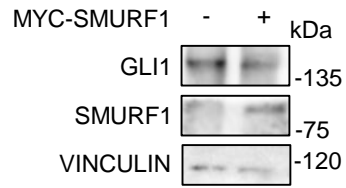**B**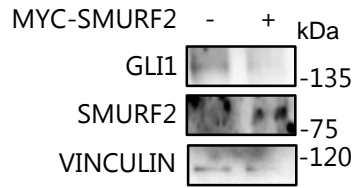

**Supplementary Figure S8. SMURF1 and SMURF2 overexpression triggers GLI1 endogenous protein decrease also in a PTCH1-KO context.**

**A-B.** Analysis of SMURFs overexpression effects on GLI1 protein levels. PTCH1-KO MEF cells were transfected with either SMURF1 or SMURF2 coding vectors. 24h after transfection, cells were lysed, and proteins were analysed by SDS-PAGE. Proteins have been detected using antibodies anti-GLI1, anti-MYC and anti-VINCULIN (used as a normalizer).
